# Supplementary material for: Bioengineered perfused human brain microvascular networks enhance neural progenitor cell survival, neurogenesis, and maturation
Source: PubMed Central journal article supplement (PMC10171804; doi:10.1126/sciadv.aaz9499), 2023-05-10
Supplement: sciadv.aaz9499_sm.pdf [file sciadv.aaz9499_sm.pdf]

Supplementary Materials for

**Bioengineered perfused human brain microvascular networks enhance neural progenitor cell survival, neurogenesis and maturation**

Max A. Winkelman and Guohao Dai

Corresponding author: Guohao Dai, [g.dai@northeastern.edu](mailto:g.dai@northeastern.edu)

*Sci. Adv.* **9**, eaaz9499 (2023)  
DOI: 10.1126/sciadv.aaz9499

**The PDF file includes:**

Supplementary Text  
Figs. S1 to S9  
Tables S1 to S3  
Legend for movie S1

**Other Supplementary Material for this manuscript includes the following:**

Movie S1

## **Supplementary Materials for “Bioengineered Perfused Human Brain Microvascular Networks Enhance Neural Progenitor Cell Survival, Neurogenesis and Maturation”**

### **S1. Supplementary Methods**

#### **S1.1 Microsphere Perfusion Assay**

After BMVNs were formed in MFDs using methods described in Sections 4.3 and 4.11, anastomosis was assessed using Dragon Green™ polystyrene microspheres (1.9 μm diameter, Bang Laboratories, Cat: FSDG005). Briefly, microspheres were resuspended in EGM-2 at a ratio of 1:1000. For all samples, 50 μL of unadulterated EGM-2 were added to both reservoirs on one side of the hydrogel channel and 70 μL of microsphere solution were added to the remaining two reservoirs. Immediately afterwards, fluorescence timelapse images (15 or 30 seconds with 150 millisecond intervals) were acquired using an Eclipse Ti2 microscope with a 10X objective. Timelapse images were represented as MIPs.

#### **S1.2 Dextran Perfusion Assay**

After BMVNs were formed in MFDs using methods described in Section 4.3, microvessel permeability was assessed using fluorescent dextran. Briefly, Oregon Green™ 488 dextran (70 kDa, Invitrogen, Cat: D7173) was dissolved in EGM-2 at a concentration of 5 μg/mL. For all samples, 50 μL of unadulterated EGM-2 were added to both reservoirs on one side of the hydrogel channel and 70 μL of dextran solution were added to the remaining two reservoirs. Immediately afterwards, fluorescence timelapse images (120 seconds with 15 second intervals) were acquired using an Eclipse Ti2 microscope with a 10X objective.

#### **S1.3 BEC Angiogenesis Assay**

To characterize the angiogenic effect of NPCs and NPreCs, we investigated their influence on BEC angiogenesis in MFDs. BECs were stimulated to produce angiogenic sprouts into fibrin matrices without cells (BEC condition), with PCs (BEC-PC condition), with ACs (BEC-AC condition), with NPCs (BEC-NPC conditions), and with NPreCs (BEC-NPreC condition). Briefly, using methods similar to those in Section 4.3, PCs, ACs, NPCs, and NPreCs were resuspended separately in fibrin gels within hydrogel channels at a density of  $2 \times 10^6$  cells/mL. For BEC conditions, MFDs were injected with fibrin gels containing no supporting cells. Next, BECs-tdT or BECs-EGFP were resuspended in EGM-2 at a density of  $5 \times 10^6$  cells/mL. Solutions of BECs-

tdT and BECs-EGFP were used in experiments to investigate the angiogenic effect of NPCs and NPreCs, respectively. For all samples, BEC solutions were added to one fluidic channel and MFDs were immediately incubated at a 90° angle for 15 minutes to promote BEC adherence to the fibrin gel. Afterwards, nonadherent BECs were washed away with PBS. Samples with BECs-tdT and BECs-EGFP were cultured in EGM-2:NPM-2 and EGM-2:NMM, respectively, under flow conditions for 7 days. On Day 1, Day 3, and Day 7, fluorescence z-stack (200 µm range with 10 µm intervals) images of angiogenic sprouts were acquired using an Eclipse Ti2 microscope with a 20X objective. In ImageJ, z-stacks were compressed to MIPs and ROIs were selected to include all angiogenic sprouts originating from between four adjacent microposts. BECs were identified by either tdTomato or EGFP signals. At each time point, the number of angiogenic sprouts in each ROI was counted. Sprout length was measured as the distance between the hydrogel-liquid interface and the tip of each sprout. This value was averaged between all sprouts in each ROI.

#### **S1.4 BEC Vasculogenesis Assay**

To characterize the vasculogenic effect of NPCs and NPreCs, we investigated their influence on BEC vasculogenesis in MFDs. BECs were stimulated to form vascular networks in fibrin gels with different supporting cells using methods similar to those in Section 4.3. Briefly, BECs-tdT or BECs-EGFP were resuspended in fibrin alone (BEC condition), with PCs (BEC-PC condition), with ACs (BEC-AC condition), with NPCs (BEC-NPC condition), and with NPreCs (BEC-NPreC condition) within hydrogel channels. Samples with BECs-tdT and BECs-EGFP were used in experiments to study NPCs and NPreCs, respectively. The final cell density of both BECs-tdT and BECs-EGFP was  $6 \times 10^6$  cells/mL. The final cell density of PCs, ACs, NPCs, and NPreCs was  $2 \times 10^6$  cells/mL. Samples with BECs-tdT and BECs-EGFP were cultured in EGM-2:NPM-2 and EGM-2:NMM, respectively, under flow conditions for 7 days. On Day 7, fluorescence z-stack (200 µm range with 10 µm intervals) images of vascular networks were acquired using an Eclipse Ti2 microscope with a 10X objective.

#### **S1.5 Microvessel Analysis**

To quantify and compare BMVN characteristics, microvessel analysis was performed. Briefly, fluorescence z-stack images were acquired from samples containing BMVNs using either an Eclipse Ti2 microscope or a LSM 800 confocal microscope. Z-stacks were then converted to

MIPs in ImageJ. EGFP or tdTomato signals were used to identify microvessels in images. Blood vessel area was measured as the area of microvessels within a given ROI and represented as a percentage of the total area. Using Skeletonize and Analyze Skeleton in ImageJ, average branch diameter was calculated using the following equation:

$$D_B = \frac{A_V}{n_B \times L_B} \quad (\text{Eq. S1})$$

where  $A_V$  is blood vessel area,  $n_B$  is the number of vessel branches, and  $L_B$  is the average vessel branch length. We also measured the number of vessel segments, which was defined as the number of continuous, interconnected microvessels in each ROI.

## S2. Supplementary Figures

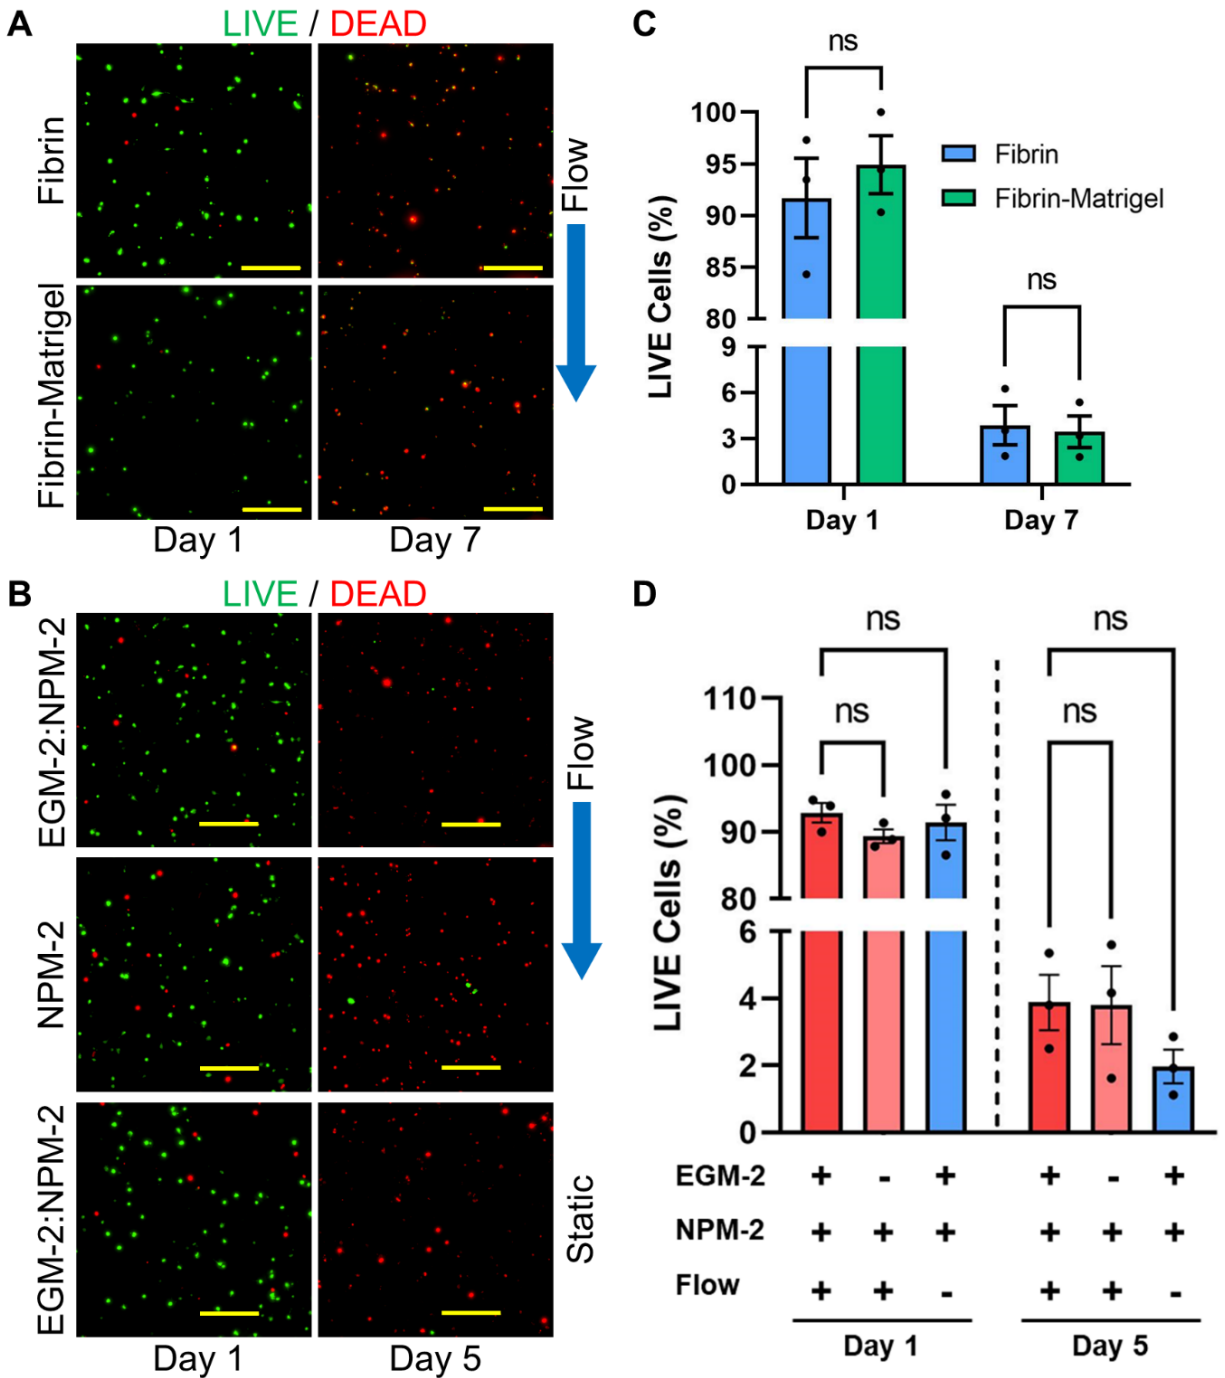

**Figure S1. Viability of dispersed neural progenitor cells (NPCs) in MFD culture.** A,B) LIVE (green) / DEAD (red) MIPs of NPCs cultured under various conditions in MFDs. A) To identify the influence of ECM on cell viability, NPCs ( $2 \times 10^6$  NPCs/mL) were resuspended in fibrin or fibrin-Matrigel hydrogels and imaged on Day 1 and Day 7. B) To identify the influence of interstitial flow and culture medium on cell viability, NPCs ( $2 \times 10^6$  NPCs/mL) were cultured in fibrin gels under flow or static conditions in either EGM-2:NPM-2 or NPM-2 and imaged on Day 1 and Day 5. Scale bars indicate 200  $\mu$ m. Blue arrows indicate the direction of interstitial flow when applied. C,D) Graph of the corresponding percentage of LIVE NPCs cultured in different ECMs (C) and interstitial flow and cell medium conditions (D). The data show mean value, error bars  $\pm$  SEM,  $n = 3$ , two-way ANOVA with Šidák's (C) and Dunnett's (D) test,  $ns > 0.05$ .

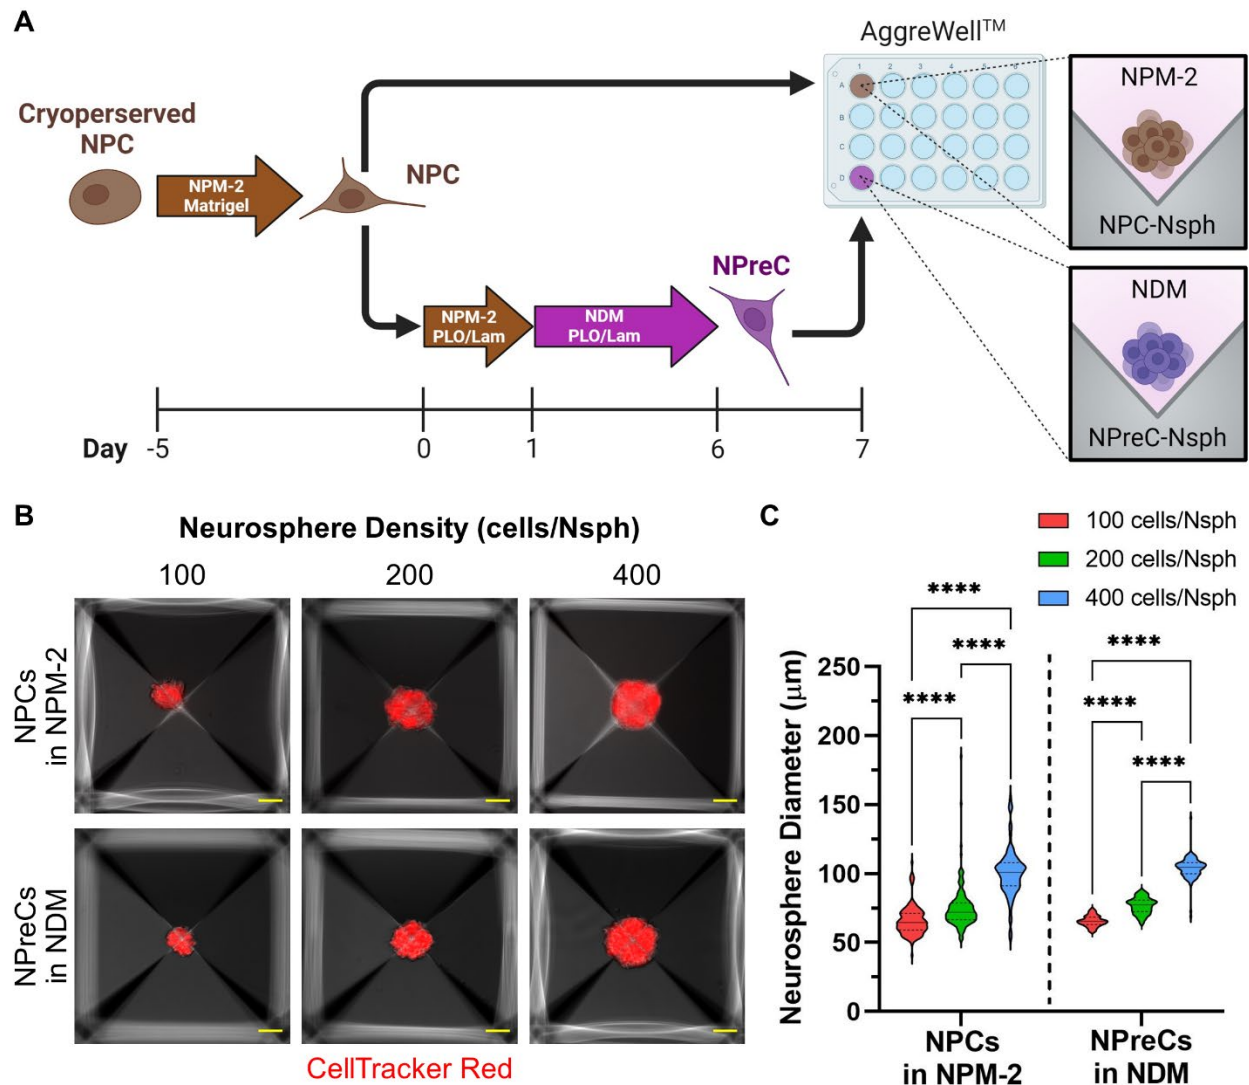

**Figure S2. Neural progenitor cell (NPC) and neuronal precursor cell (NPreC) neurosphere generation.** **A)** Diagram of NPC and NPreC culture and neurosphere generation. Culture dishes were coated with Matrigel or Poly-L-Ornithine and Laminin (PLO/Lam) where indicated. NPC neurospheres (NPC-Nsphs) and NPreC neurospheres (NPreC-Nsphs) were aggregated in AggreWell™ Microwell Plates for 24 hours in NPM-2 and neuron differentiation medium (NDM), respectively, according to the manufacturer's instructions. **B)** Phase/fluorescence images of NPC-Nsphs and NPreC-Nsphs formed in microwells at densities of 100, 200, and 400 cells per neurosphere (cells/Nsph). Both cell types were labeled with CellTracker Red (red) to assist in diameter measurement. Scale bars indicate 50 μm. **C)** Violin plot of the diameters measured for NPC-Nsphs and NPreC-Nsphs with densities of 100, 200, and 400 cells/Nsph. The plot shows the empirical distribution of the data from the minimum to the maximum value. Solid lines indicate median value.  $N > 104$  neurospheres were measured from same microwell in each condition, two-way ANOVA with Šidák's test, \*\*\*\*  $p < 0.0001$ .

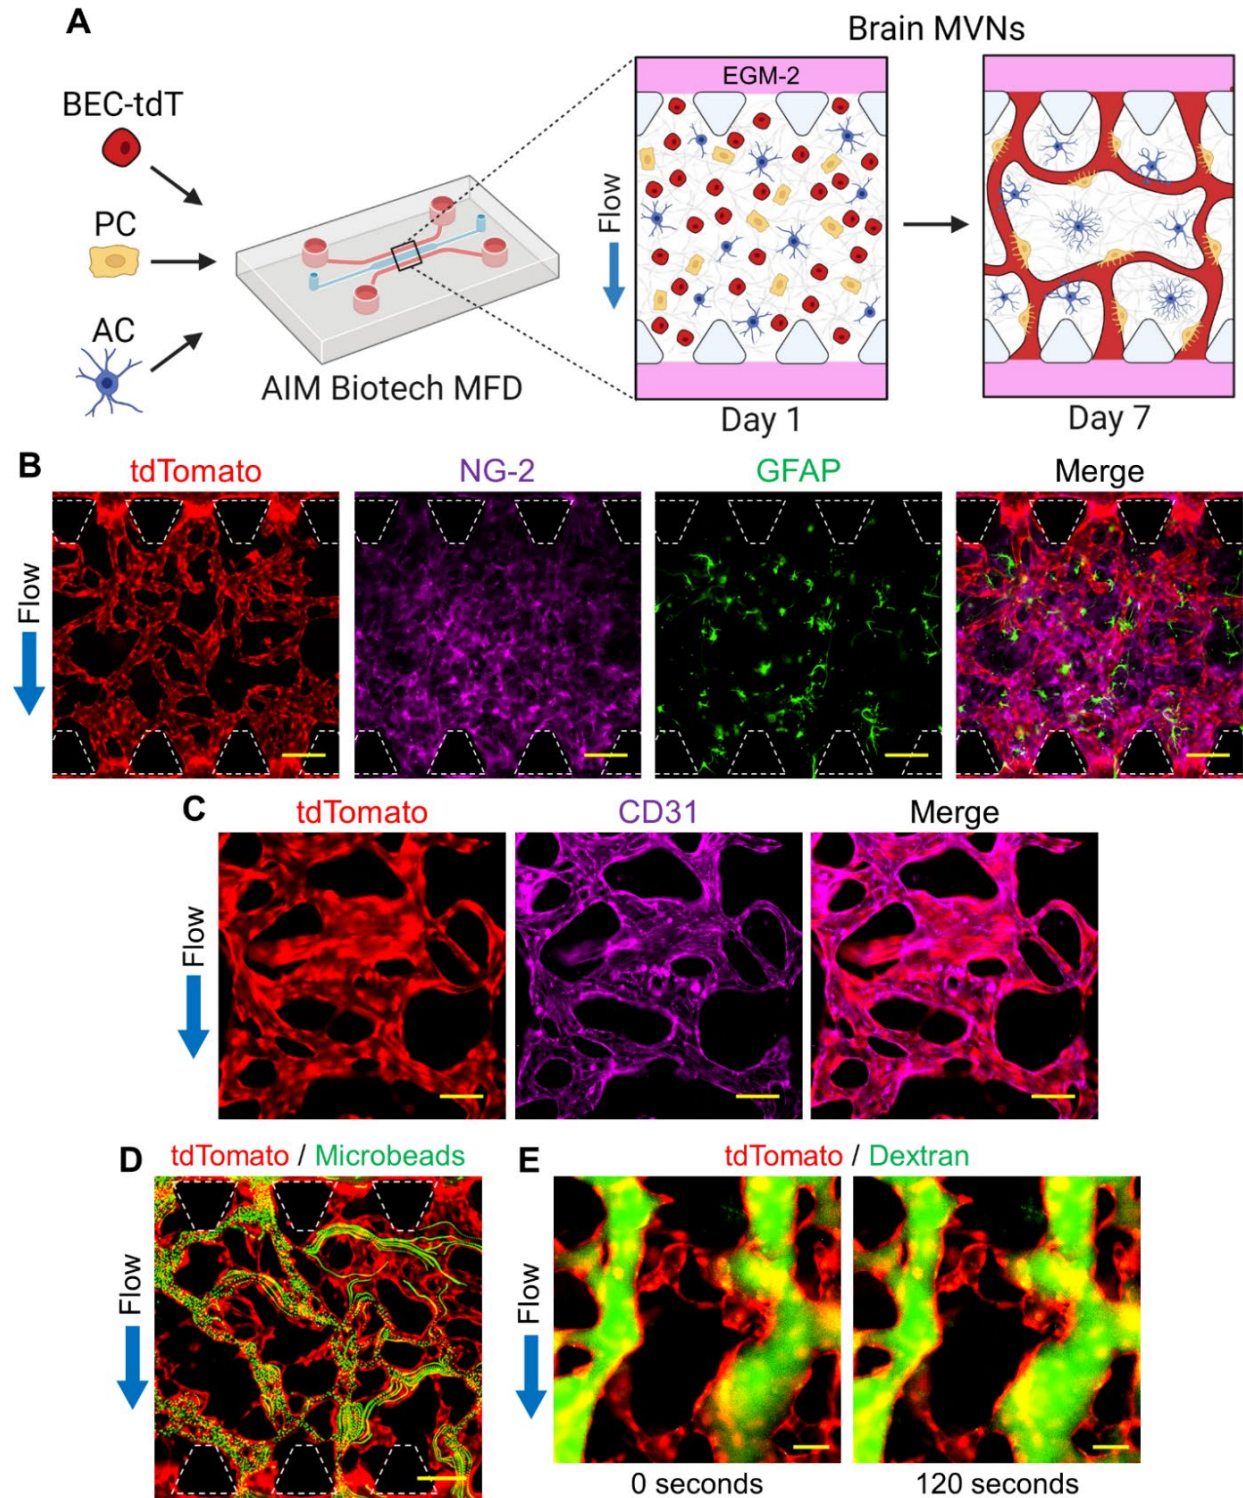

**Figure S3. Brain microvascular networks (BMVNs) in MFDs.** **A**) Illustration of the culture protocol used to develop BMVNs. Briefly, BECs-tdT, PCs, and ACs were resuspended in fibrin within MFDs and cultured in EGM-2 under flow conditions for one week. **B**) Fluorescence image of BMVN comprised of BECs (tdTomato, red), PCs (NG-2, purple), and ACs (GFAP, green) on Day 7. **C**) Fluorescence image of microvessels (tdTomato, red) expressing CD31 (purple). **D**) Fluorescence timelapse MIP of microspheres (green) flowing through the open lumen of microvessels (tdTomato, red). **E**) Fluorescence timelapse images of dextran solution (green) retained in microvessels

(tdTomato, red). **B-E**) White dotted lines outline microposts. Blue arrows indicate the direction of interstitial flow. Scale bars indicate **B**) 200, **C**) 100, **D**) 200, and **E**) 50  $\mu\text{m}$ .



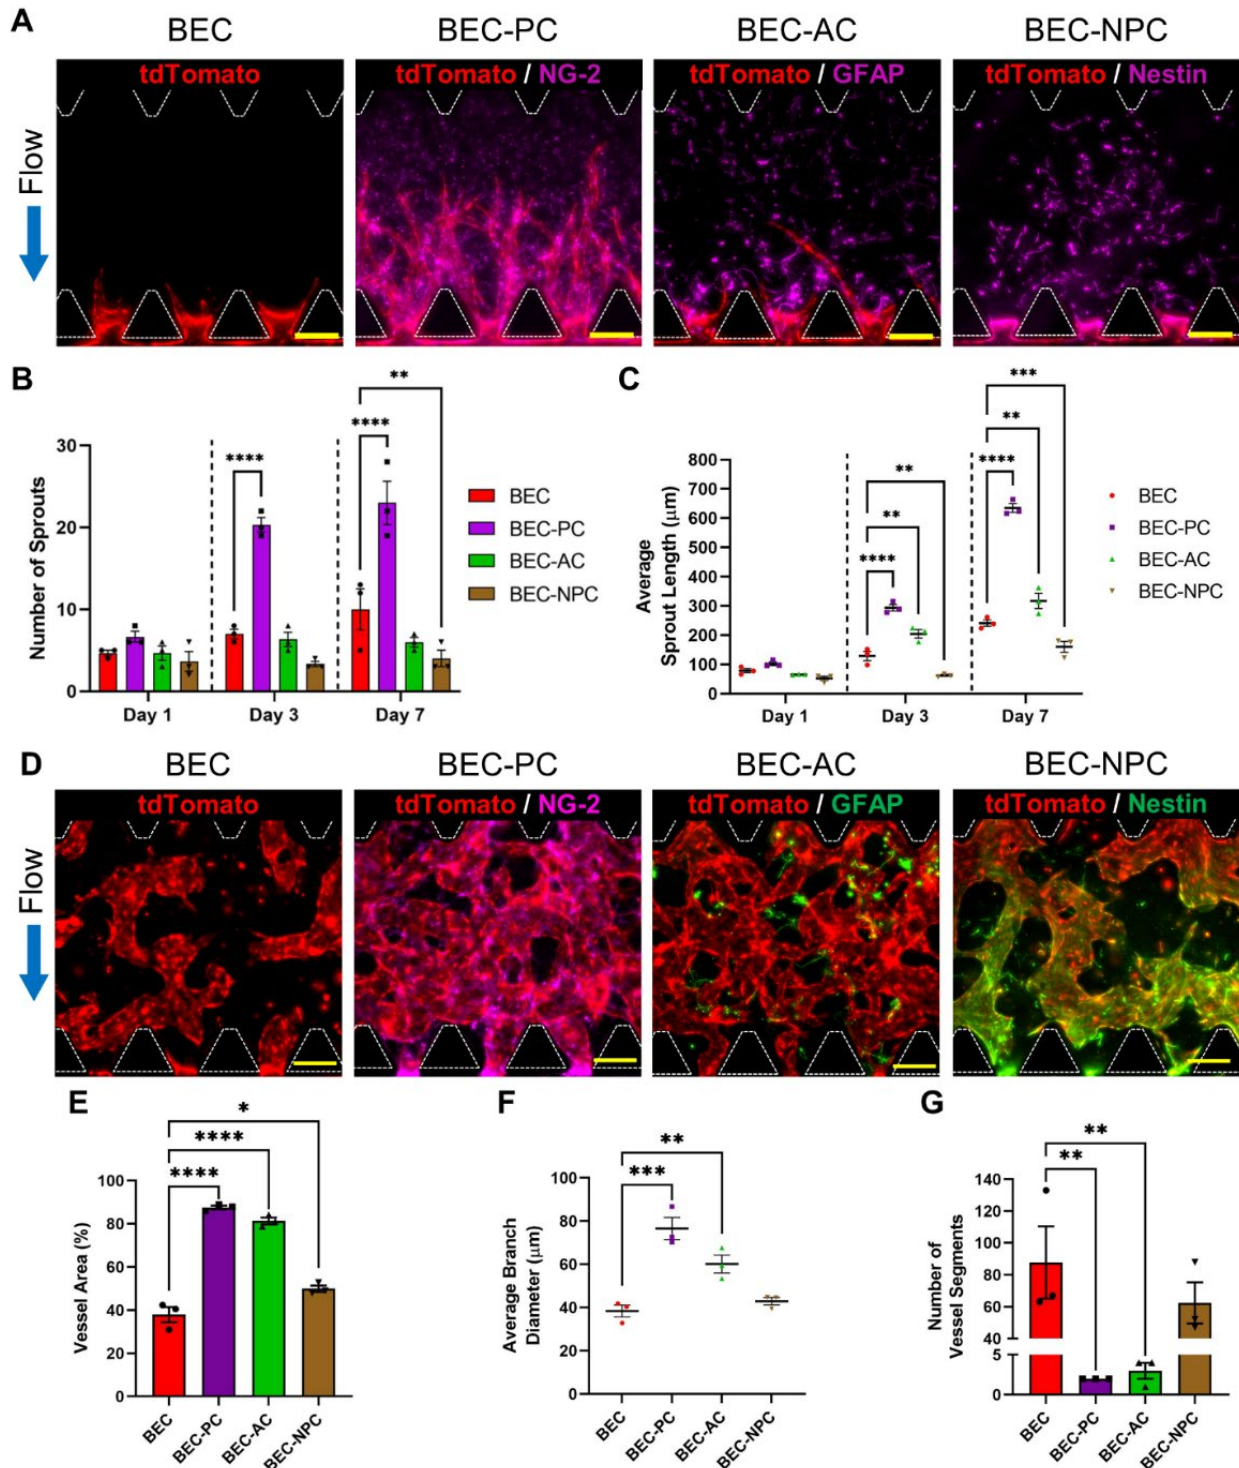

**Figure S4. BEC angiogenesis and vasculogenesis assay with neural progenitor cells (NPCs) in MFDs.** **A)** For the angiogenesis assay, BECs-tdT (tdTomato, red) were side-seeded in the fluidic channel of MFDs. BECs-tdT were promoted to grow sprouts into fibrin gels with no supporting cells (BEC condition), with PCs (BEC-PC condition, NG-2, purple), with ACs (BEC-AC condition, GFAP, purple), and with NPCs (BEC-NPC condition, nestin, purple). Fluorescence MIPs of angiogenic sprouts were acquired on Day 7. **B,C)** Graphs of the number of sprouts (**B**) and average sprout length (**C**) measured for BEC, BEC-PC, BEC-AC, and BEC-NPC conditions in the angiogenesis assay on Day 1, Day 3, and Day 7. Data from  $n = 3$  MFDs. **D)** For the vasculogenesis assay, BECs-tdT (tdTomato, red) were

seeded in the hydrogel channel of MFDs. BECs-tdT were promoted to form vascular networks with no supporting cells (BEC condition), with PCs (BEC-PC condition, NG-2, purple), with ACs (BEC-AC condition, GFAP, green), and with NPCs (BEC-NPC condition, nestin, green). Fluorescence MIPs of vascular networks were acquired on Day 7. **A,D**) Scale bars indicate 200  $\mu\text{m}$ . White dotted lines outline microposts. Blue arrows indicate the direction of interstitial flow. **E-G**) Graphs of the vessel area (**E**), average branch diameter (**F**), and number of vessel segments (**G**) measured for BEC, BEC-PC, BEC-AC, and BEC-NPC conditions in the vasculogenesis assay on Day 7. Data averaged from 3 ROIs from  $n = 3$  MFDs. **B,C,E,F,G**) The data show mean value, error bars  $\pm$  SEM, BEC condition (control) was compared to all other conditions, two-way (**B,C**) and one-way ANOVA (**E-G**) with Dunnett's test, absence of significance line indicates  $p > 0.05$ , \*  $p < 0.05$ , \*\*  $p < 0.01$ , \*\*\*  $p < 0.001$ , \*\*\*\*  $p < 0.0001$ .

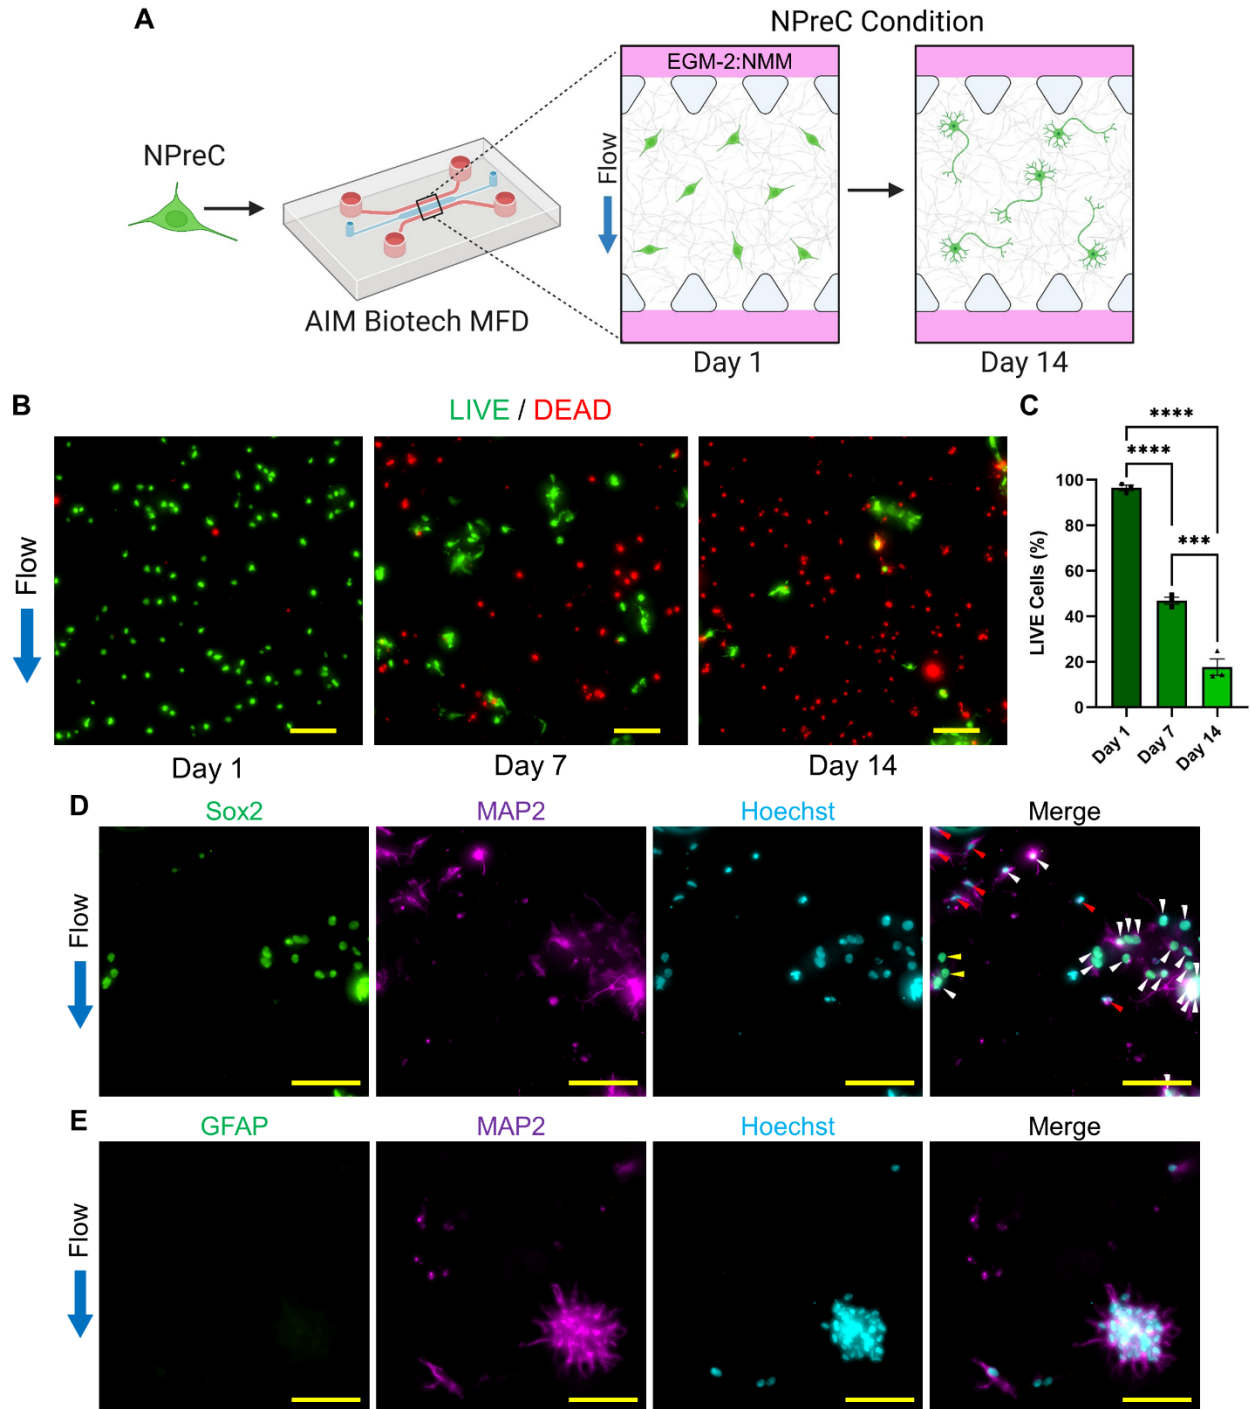

**Figure S5. Viability of dispersed neuronal precursor cells (NPreCs) in MFD culture.** **A**) Illustration of dispersed NPreC solo-culture in MFDs. NPreCs ( $2 \times 10^6$  cells/mL) were resuspended in fibrin gels (NPreC condition) within MFDs. Samples were cultured for two weeks in EGM-2:NMM under flow conditions. **B**) LIVE (green) / DEAD (red) MIPs of NPreCs on Day 1, Day 7, and Day 14. **C**) Graph of the corresponding percentage of LIVE NPreCs on Day 1, Day 7, and Day 14. The data show mean value, error bars  $\pm$  SEM,  $n = 3$ , one-way ANOVA with Tukey's test, \*\*\*  $p < 0.001$ , \*\*\*\*  $p < 0.0001$ . **D,E**) Fluorescence images of dispersed NPreCs in MFDs on Day 14. Cells were labeled with Sox2 (**D**, green), MAP2 (**D,E**, purple), and GFAP (**E**, green). Nuclei were labeled with Hoechst (blue). Yellow, red, and white triangles indicate Sox2<sup>+</sup>/MAP2<sup>-</sup>, Sox2<sup>-</sup>/MAP2<sup>+</sup>, and Sox2<sup>+</sup>/MAP2<sup>+</sup> nuclei, respectively. **B,D,E**) Scale bars indicate 100  $\mu$ m. Blue arrows indicate the direction of interstitial flow.

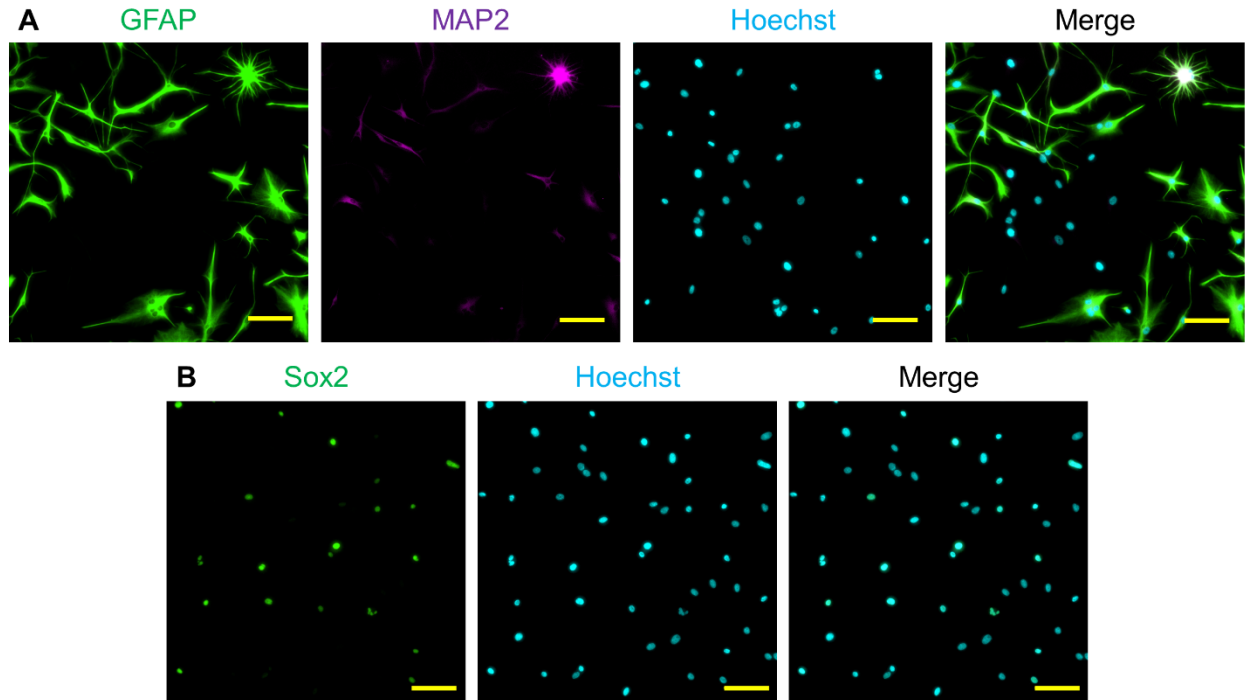

**Figure S6. Immunocytochemistry of human astrocytes. A,B)** Fluorescence images of astrocytes expressing GFAP (A green), MAP2 (A, purple), and Sox2 (B, green) on Day 3 of 2D cell culture. Nuclei are labeled with Hoechst (blue). Scale bars indicate 100  $\mu\text{m}$ .

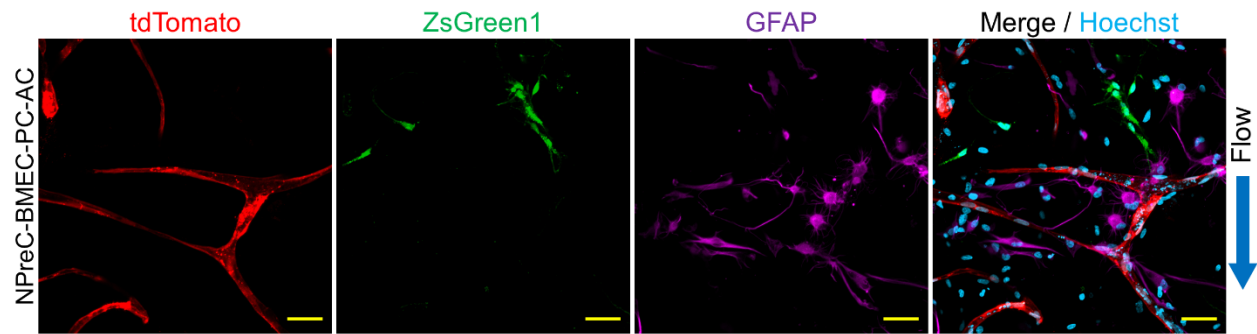

**Figure S7. Immunocytochemistry of NPreCs with BMVNs in MFD culture.** Fluorescence confocal MIPs of NPreCs-ZsG (ZsGreen1, green) cultured with BMECs-tdT (tdTomato, red), PCs, and ACs (NPreC-BMEC-PC-AC condition) on Day 14. ACs were stained for GFAP (purple). PCs were not labeled. Nuclei were labeled with Hoechst (blue). No examples of ZsGreen1+/GFAP+ cells were identified. Scale bars indicate 50  $\mu$ m. Blue arrow indicates the direction of interstitial flow.

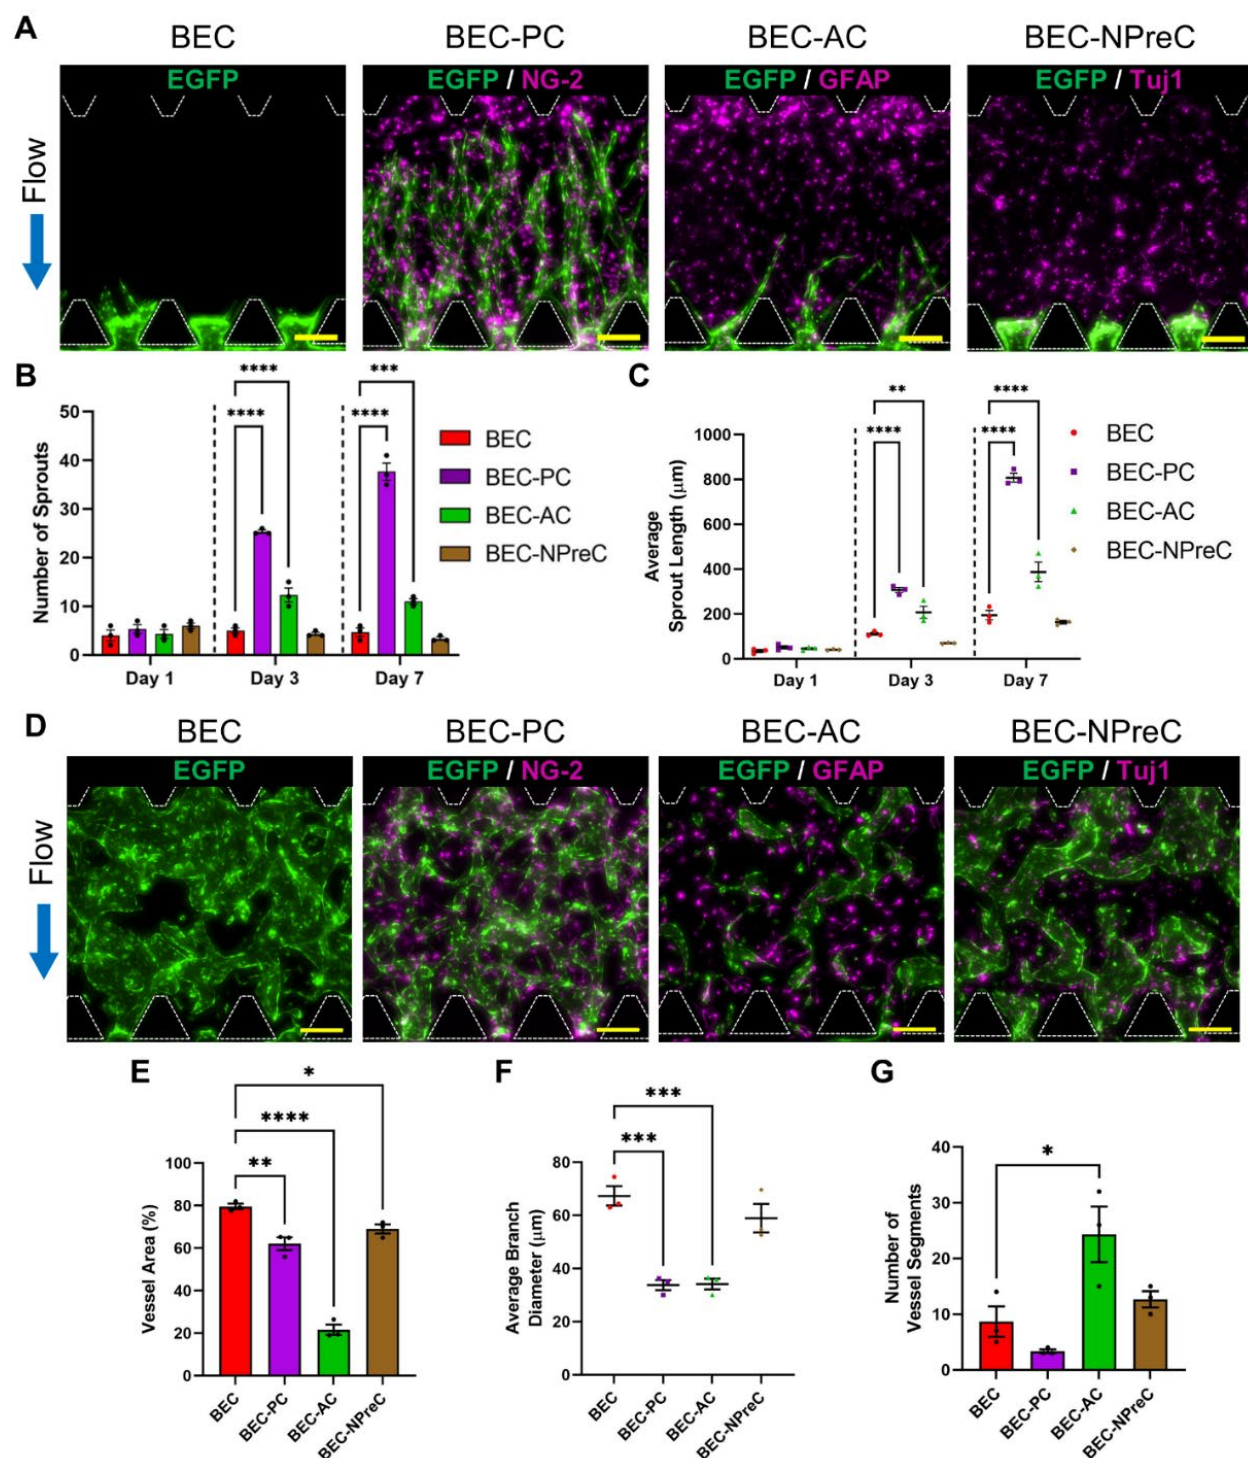

**Figure S8. BEC angiogenesis and vasculogenesis assay with neuronal precursor cells (NPreCs) in MFDs.** **A**) For the angiogenesis assay, BECs-EGFP (EGFP, green) were side-seeded in the fluidic channel of MFDs. BECs-EGFP were promoted to grow sprouts into fibrin gels with no supporting cells (BEC condition), with PCs (BEC-PC condition, NG-2, purple), with ACs (BEC-AC condition, GFAP, purple), and with NPreCs (BEC-NPreC condition, Tuj1, purple). Fluorescence MIPs of angiogenic sprouts were acquired on Day 7. **B,C**) Graphs of the number of sprouts (**B**) and average sprout length (**C**) measured for BEC, BEC-PC, BEC-AC, and BEC-NPreC conditions in the angiogenesis assay on Day 1, Day 3, and Day 7. Data from  $n = 3$  MFDs. **D**) For the vasculogenesis assay, BECs-EGFP (EGFP, green) were seeded in the hydrogel channel of MFDs. BECs-EGFP were promoted to form vascular

networks with no supporting cells (BEC condition), with PCs (BEC-PC condition, NG-2, purple), with ACs (BEC-AC condition, GFAP, purple), and with NPreCs (BEC-NPreC condition, Tuj1, purple). Fluorescence MIPs of vascular networks were acquired on Day 7. **A,D**) Scale bars indicate 200  $\mu\text{m}$ . White dotted lines outline microposts. Blue arrows indicate the direction of interstitial flow. **E-G**) Graphs of the vessel area (**E**), average branch diameter (**F**), and number of vessel segments (**G**) measured for BEC, BEC-PC, BEC-AC, and BEC-NPreC conditions in the vasculogenesis assay on Day 7. Data averaged from 3 ROIs from  $n = 3$  MFDs. **B,C,E,F,G**) The data show mean value, error bars  $\pm$  SEM, BEC condition (control) was compared to all other conditions, two-way (**B,C**) and one-way ANOVA (**E-G**) with Dunnett's test, absence of significance line indicates  $p > 0.05$ , \*  $p < 0.05$ , \*\*  $p < 0.01$ , \*\*\*  $p < 0.001$ , \*\*\*\*  $p < 0.0001$ .

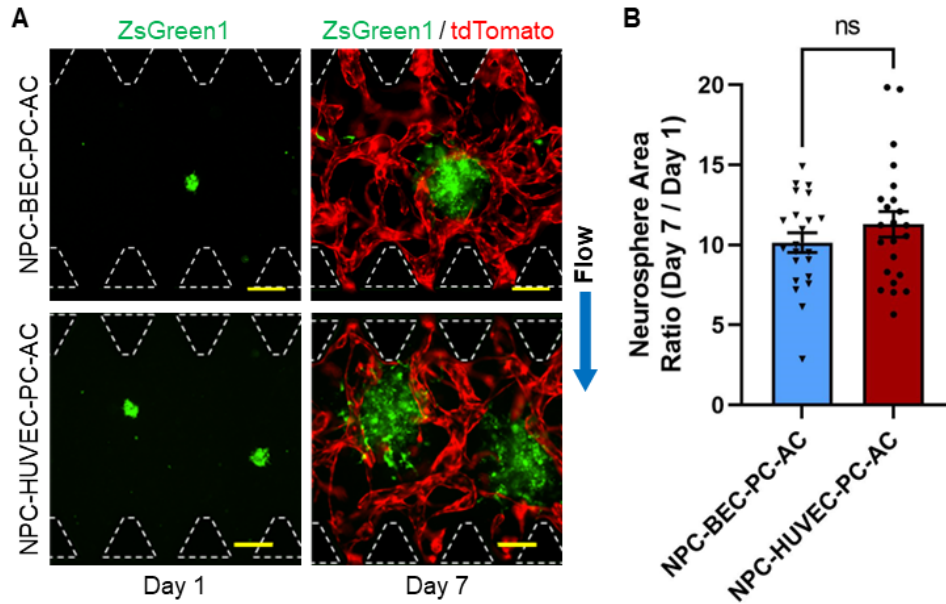

**Figure S9. Effect of endothelial cell source on NPC neurosphere expansion in MFDs.** This experiment was done in tandem to the experiment shown in Figure 3. Briefly, NPCs expressing ZsGreen1 were aggregated into neurospheres (NPC-ZsG-Nsphs) and cultured with either BECs-tdT, PCs, and ACs (NPC-BEC-PC-AC condition) or with HUVECs-tdT, PCs, and ACs (NPC-HUVEC-PC-AC condition) in fibrin gels within MFDs. Samples were cultured for one week in EGM-2:NPM-2 under flow conditions. **A)** Fluorescence MIPs of NPC-ZsG-Nsphs (ZsGreen1, green) cultured in NPC-BEC-PC-AC and NPC-HUVEC-PC-AC conditions on Day 1 and Day 7. BECs-tdT and HUVEC-tdT microvessels (tdTomato, red) were only imaged on Day 7. PCs and ACs are not shown. White dotted lines outline microposts. Blue arrow indicates the direction of interstitial flow for both conditions. Scale bars indicate 200  $\mu\text{m}$ . **B)** Graph showing the Day7/Day1 neurosphere area ratio for both conditions.  $N \geq 22$  neurospheres were measured from  $n = 3$  MFDs. The data show mean value, error bars  $\pm$  SEM, Welch's t-test, ns  $p > 0.05$ .



### S3. Supplementary Tables

| Target Species | Target Protein          | Host Species | Company           | Catalog Number | Concentration |
|----------------|-------------------------|--------------|-------------------|----------------|---------------|
| Human          | Nestin                  | Rabbit       | BioLegend         | 841901         | 1:200         |
| Human          | Sox2                    | Rabbit       | Invitrogen        | PA5-85144      | 1:100         |
| Human          | GFAP                    | Rabbit       | Invitrogen        | PA1-10019      | 1:1000        |
| Human          | Neuron-Specific<br>Tuj1 | Mouse        | R&D Systems       | MAB1195        | 1:100         |
| Human          | MAP2                    | Mouse        | Invitrogen        | 13-1500        | 1:400         |
| Human          | NG-2                    | Mouse        | eBioscience       | 14-6504-80     | 1:100         |
| Human          | CD31                    | Mouse        | BD<br>Biosciences | 550389         | 1:50          |
| Human          | Ki67                    | Mouse        | Invitrogen        | 14-5699-82     | 1:500         |

**Table S1. Primary Antibodies for Immunocytochemistry.**

| <b>Host Species</b> | <b>Target Species</b> | <b>Excitation Wavelength</b> | <b>Company</b> | <b>Catalog Number</b> | <b>Concentration</b> |
|---------------------|-----------------------|------------------------------|----------------|-----------------------|----------------------|
| Goat                | Rabbit                | 488                          | Invitrogen     | A11034                | 1:500                |
| Goat                | Rabbit                | 647                          | Invitrogen     | A32733                | 1:500                |
| Goat                | Mouse                 | 647                          | Invitrogen     | A21236                | 1:500                |

**Table S2. Secondary Antibodies for Immunocytochemistry.**

| Abbreviation     | Cell Types                               | Cell Arrangement                      | Interstitial Flow | Cell Culture Medium      |
|------------------|------------------------------------------|---------------------------------------|-------------------|--------------------------|
| NPC              | NPCs cultured alone                      | Dispersed NPCs or NPC-Nsphs           | Flow or Static    | EGM-2:NPM-2 or NPM-2     |
| NPC-PC           | NPCs cultured with PCs                   | Dispersed NPCs or NPC-Nsphs           | Flow              | EGM-2:NPM-2              |
| NPC-AC           | NPCs cultured with ACs                   | Dispersed NPCs or NPC-Nsphs           | Flow              | EGM-2:NPM-2              |
| NPC-BEC          | NPCs cultured with BECs                  | Dispersed NPCs or NPC-Nsphs           | Flow              | EGM-2:NPM-2              |
| NPC-BEC-PC-AC    | NPCs cultured with BECs, PCs, and ACs    | Dispersed NPCs or NPC-Nsphs           | Flow or Static    | EGM-2:NPM-2              |
| NPC-HUVEC-PC-AC  | NPCs cultured with HUVECs, PCs, and ACs  | NPC-Nsphs                             | Flow              | EGM-2:NPM-2              |
| NPreC            | NPreCs cultured alone                    | Dispersed NPreCs or NPreC-Nsphs       | Flow              | EGM-2:NMM                |
| NPreC-PC         | NPreCs cultured with PCs                 | Dispersed NPreCs or NPreC-Nsphs       | Flow              | EGM-2:NMM                |
| NPreC-AC         | NPreCs cultured with ACs                 | Dispersed NPreCs or NPreC-Nsphs       | Flow              | EGM-2:NMM                |
| NPreC-BEC        | NPreCs cultured with BECs                | Dispersed NPreCs or NPreC-Nsphs       | Flow              | EGM-2:NMM                |
| NPreC-BEC-PC-AC  | NPreCs cultured with BECs, PCs, and ACs  | Dispersed NPreCs or NPreC-Nsphs       | Flow or Static    | EGM-2:NMM                |
| NPreC-BMEC-PC-AC | NPreCs cultured with BMECs, PCs, and ACs | Dispersed NPreCs                      | Flow or Static    | EGM-2:NMM                |
| BEC              | BECs cultured alone                      | BECs in fluidic channel or fibrin gel | Flow              | EGM-2:NPM-2 or EGM-2:NMM |
| BEC-PC           | BECs cultured with PCs                   | BECs in fluidic channel or fibrin gel | Flow              | EGM-2:NPM-2 or EGM-2:NMM |
| BEC-AC           | BECs cultured with ACs                   | BECs in fluidic channel or fibrin gel | Flow              | EGM-2:NPM-2 or EGM-2:NMM |
| BEC-NPC          | BECs cultured with NPCs                  | BECs in fluidic channel or fibrin gel | Flow              | EGM-2:NPM-2              |
| BEC-NPreC        | BECs cultured with NPreCs                | BECs in fluidic channel or fibrin gel | Flow              | EGM-2:NMM                |

**Table S3. List of Experimental Conditions.**

#### **S4. Supplementary Movie Captions**

**Movie S1. Perfused brain microvascular networks with neuronal precursor cell neurospheres (NPreC-Nsphs).** Associated with Fig. 7K in main text. Fluorescence timelapse image of microspheres (green) flowing through brain microvessels (tdTomato, red) supporting NPreC-Nsphs (Tuj1, purple) cultured under flow conditions on Day 7. PCs and ACs are not shown.
